# Supplementary material for: HTLV-1 CTCF-binding site is dispensable for in vitro immortalization and persistent infection in vivo
Source: PubMed Central journal article supplement (PMC6925871; doi:10.1186/s12977-019-0507-9), 2019-12-21

Log<sub>10</sub> p30 copy number  
(normalized to 10<sup>6</sup> hGAPDH)

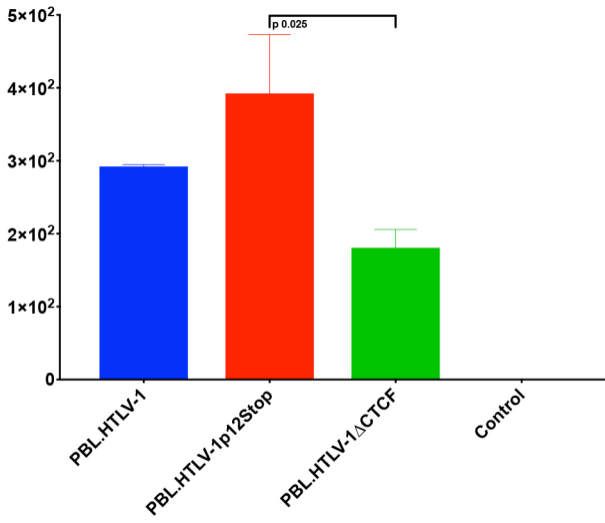

Supplement: 12977_2019_507_MOESM2_ESM.pdf [file 12977_2019_507_MOESM2_ESM.pdf]
